# Supplementary material
Source: PubMed Central journal article supplement (PMC4963288)
Supplement: NIHMS797401-supplement-2.pdf [file NIHMS797401-supplement-2.pdf]

## **Supplemental information**

### **The hidden complexity of Mendelian traits across yeast natural populations**

Jing Hou, Anastasie Sigwalt, Téo Fournier, David Pflieger, Jackson Peter, Jacky de Montigny,  
Maitreya J. Dunham and Joseph Schacherer

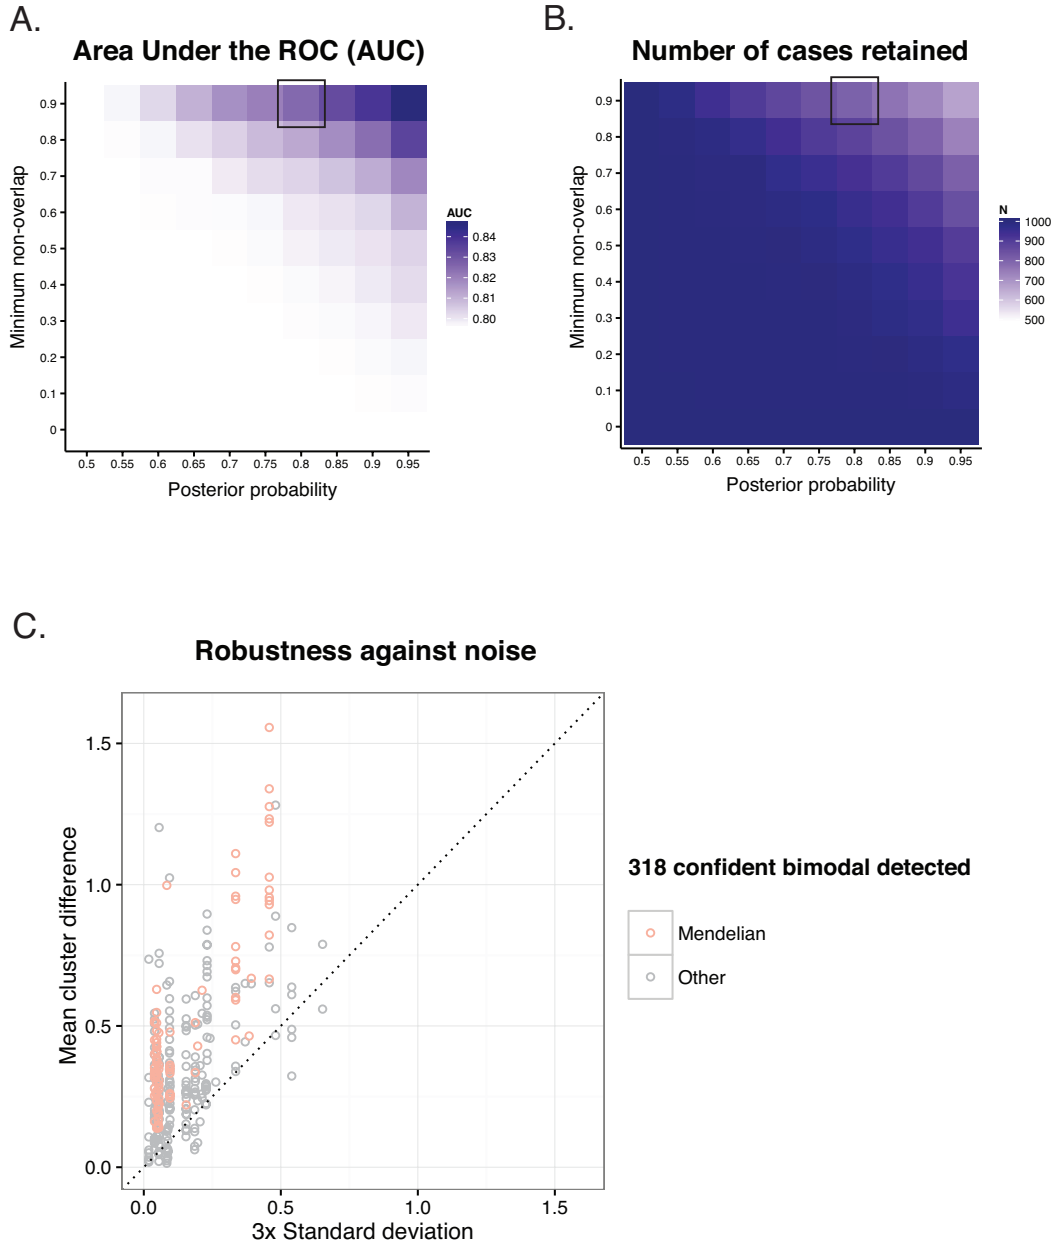

**Figure S1, related to Figure 1. Evaluation of detection power and robustness against noise.** (A) Evolution of area under the curve (AUC) with different combinations of parameters. X-axis: posterior probability cutoffs. Y-axis: minimum proportion of individuals passed the posterior probability cutoff *i.e.* non-overlapping between assigned clusters. (B) Number of cases that passed the threshold with different combinations of parameters. The axes are the same as indicated in (A) The cutoffs chosen for confident detection of bimodal distributions were highlighted. (C) Detected bimodal distributions were robust against noise. A total of 318 cases were detected as bimodal with the parental strains belong to distinct clusters using the cutoffs defined. Most cases showed mean fitness cluster difference (y-axis) higher than 3 times of standard deviation observed using replicates. Cases identified as Mendelian are in red.

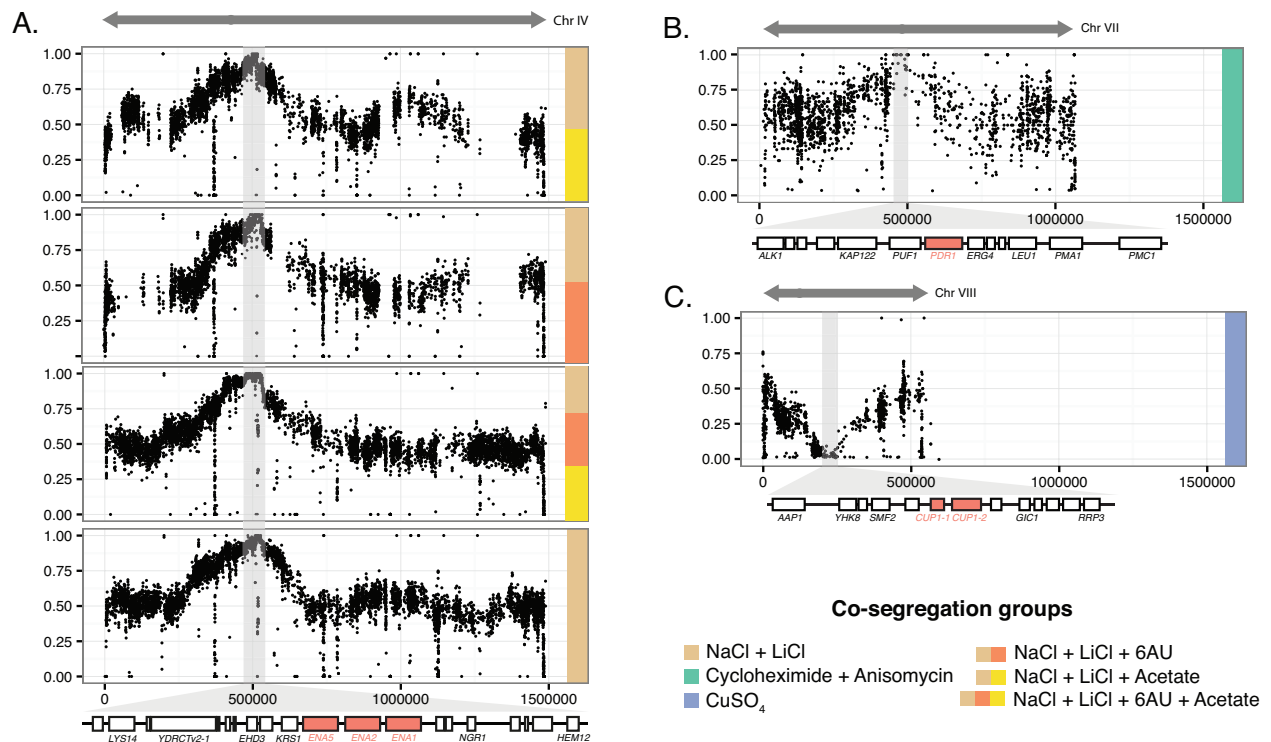

**Figure S2, related to Figure 1B. Identification of the genomic regions involved in identified Mendelian traits.** Bulk segregant analysis identified causal genomic regions in traits related to co-segregation with NaCl (A), cycloheximide and anisomycin (B) and copper sulfate (C). One chromosomal region with significantly skewed allele frequency was found in each cross, which is presented with color codes. Schematic representations of the chromosome involved are shown, with x-axis corresponding to chromosomal coordinates and y-axis to the allele frequency of the isolates crossed with  $\Sigma 1278b$ . Shaded areas correspond to regions with most skewed allele frequencies and genes with these regions are presented to scale.

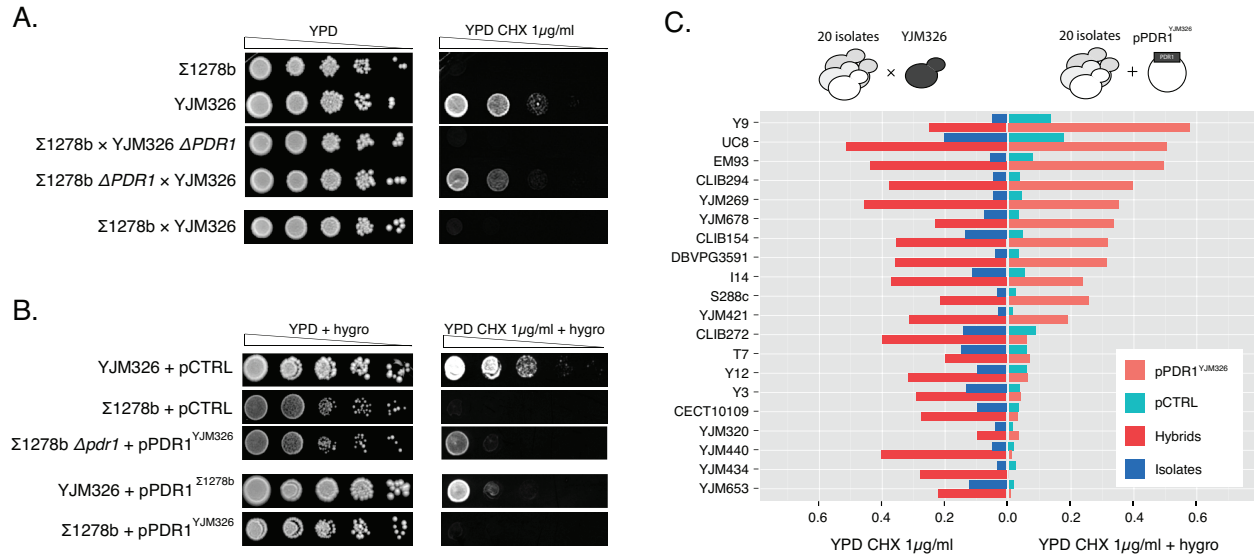

**Figure S3, related to Figure 3. Fitness comparison in strains with ectopic expression of  $PDR1^{YJM326}$  and in hybrid contexts.** (A) Reciprocal hemizygosity test for the candidate gene  $PDR1$ . Sensitive ( $\Sigma 1278b$ ) and resistant (YJM326) parental isolates as well as hybrids that are wild type or hemizygous for the  $PDR1$  gene are spotted in 5 dilutions onto YPD (left panel) and YPD CHX  $1\mu g/ml$  (right panel). Cells were grown for 48 hours at  $30^{\circ}C$ . (B) Ectopic expression of the resistance allele  $PDR1^{YJM326}$  confers drug resistance in the sensitive strain  $\Sigma 1278b$  only with deletion of  $PDR1$ . Growth of strains carrying empty control plasmid (pCTRL) or plasmids with the resistant (pPDR1<sup>YJM326</sup>) or sensitive (pPDR1 <sup>$\Sigma 1278b$</sup> ) allele was tested in the absence (left panel) or presence (right panel) of cycloheximide. All media were supplemented with  $200\mu g/ml$  of hygromycin to maintain plasmid stability. (C) The fitness values for 20 isolates in the presence of cycloheximide were compared after hybridizing with the resistant isolate YJM326 (left panel) or after transformed with plasmid carrying the resistant allele pPDR1<sup>YJM326</sup> (right panel). Strains are indicated on y-axis, with color codes correspond to different configurations (hybrid or plasmid).

A.

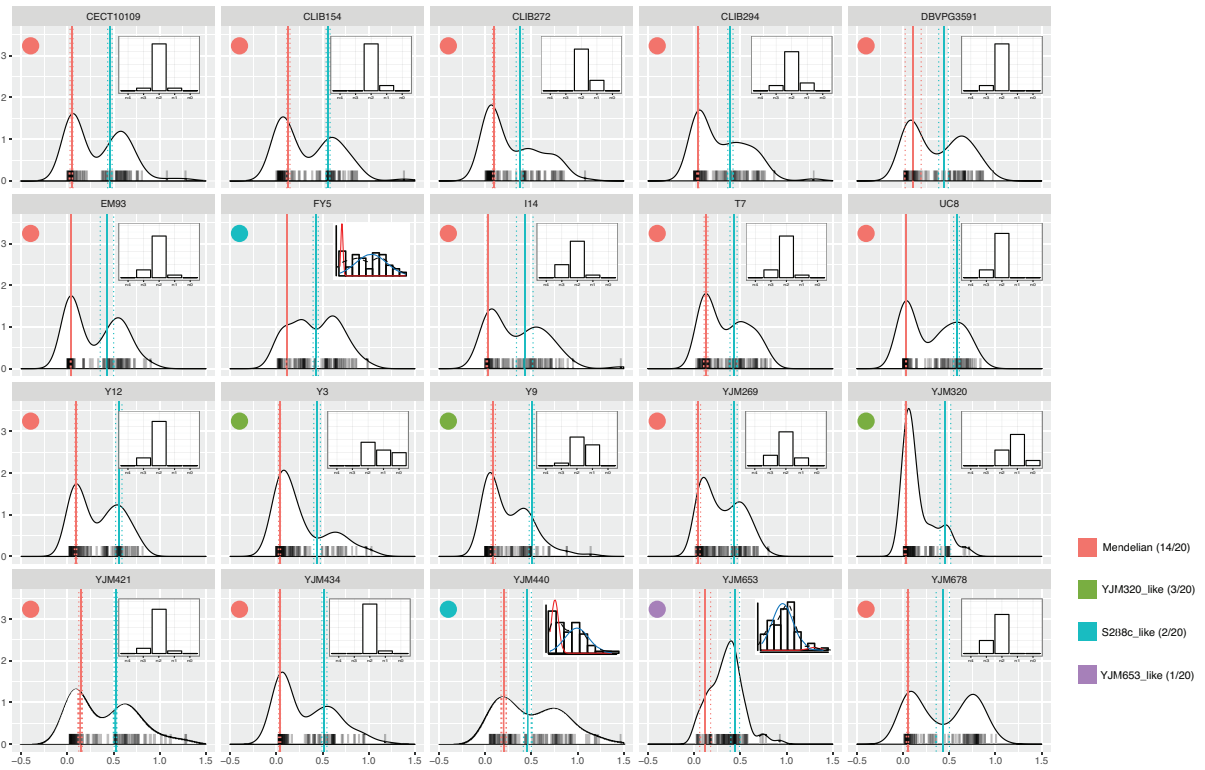

B.

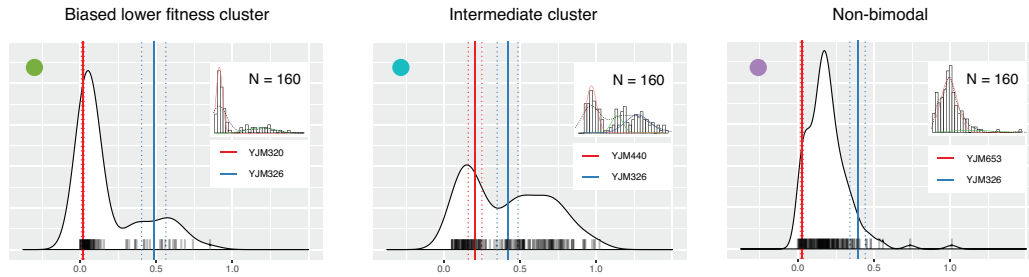

**Figure S4, related to Figure 4. Offspring fitness distribution related to drug resistance in 20 hybrid backgrounds.** (A) Distributions of 80 offspring (20 full tetrads) and the lethal phenotype segregation patterns (upper right side) in the presence of cycloheximide are presented for 20 isolates crossed with YJM326. Parental fitness values are indicated at vertical bars, with red corresponds to the sensitive isolate crossed and blue the resistant parent YJM326, and dotted lines representing  $\pm$  standard deviation ( $N = 4$ ). Different inheritance types are color-coded. In case of biased inheritance patterns, distributions and maximum likelihood cluster assignments are shown instead of segregation. (B) Additional offspring were tested for selected crosses with biased Mendelian patterns. Vertical bars indicates parental fitness values with dotted lines representing  $\pm$  standard deviation ( $N = 16$ ). A total of 160 offspring (40 tetrads) were tested.

## **Supplemental Experimental Procedures**

### **The hidden complexity of Mendelian traits across yeast natural populations**

Jing Hou, Anastasie Sigwalt, Téo Fournier, David Pflieger, Jackson Peter, Jacky de Montigny, Maitreya J. Dunham and Joseph Schacherer

## Workflow for data processing and simulations

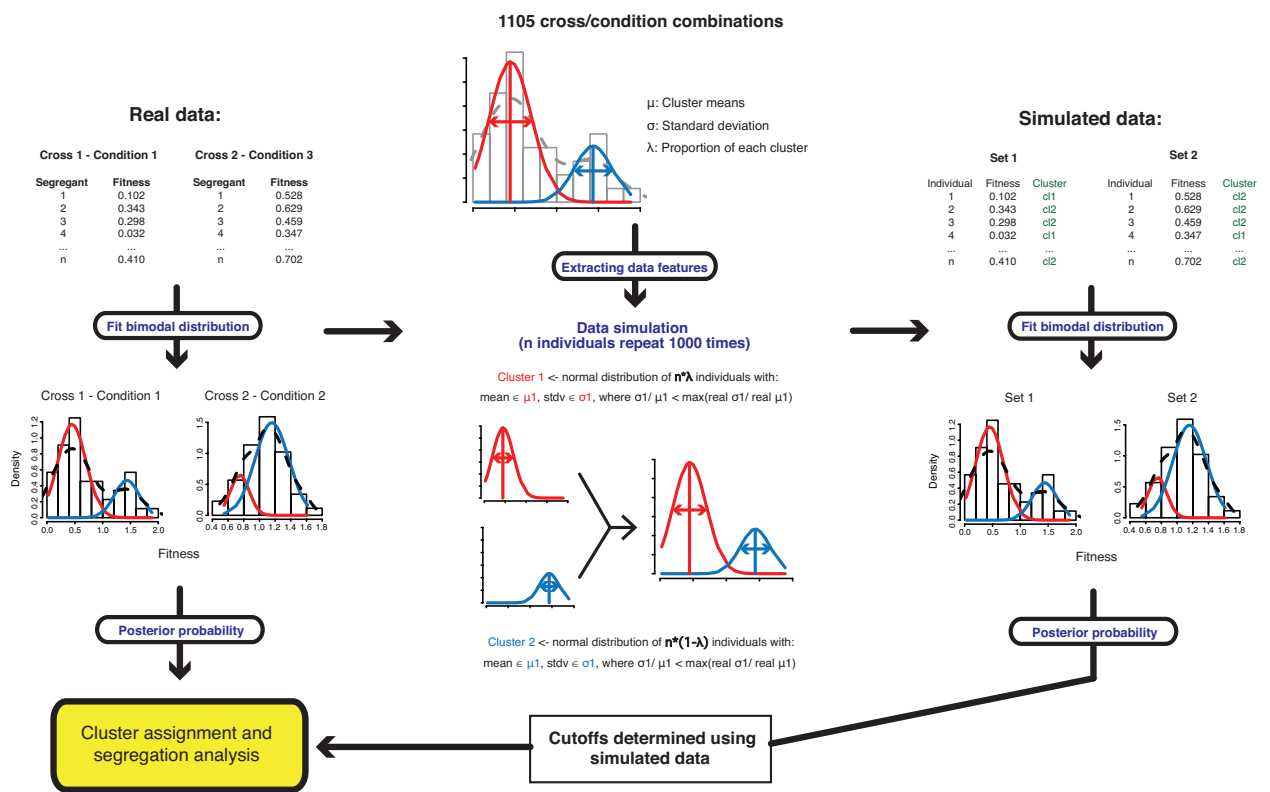

## Feature comparison of simulated dataset with the real data

A.

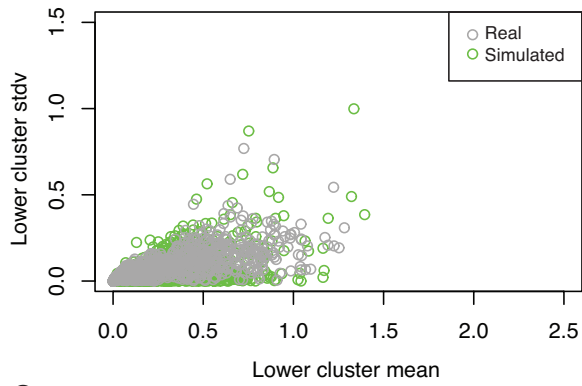

B.

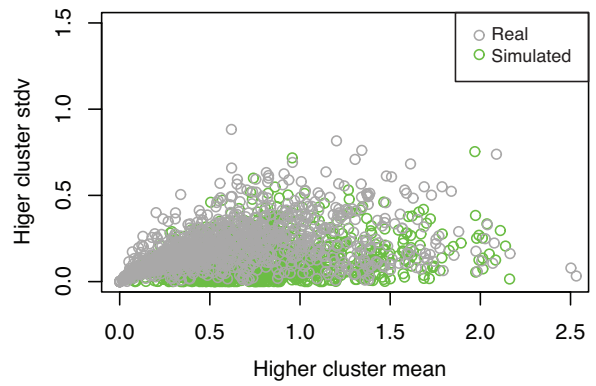

C.

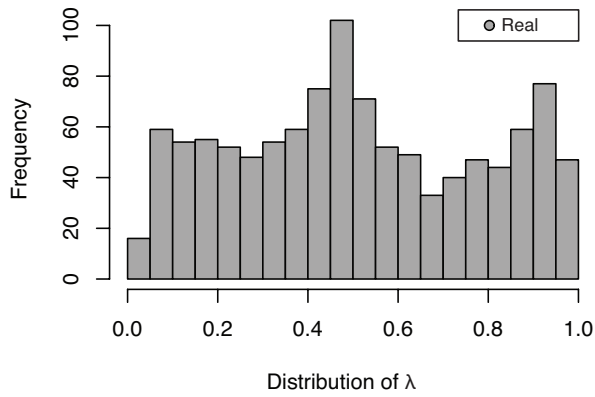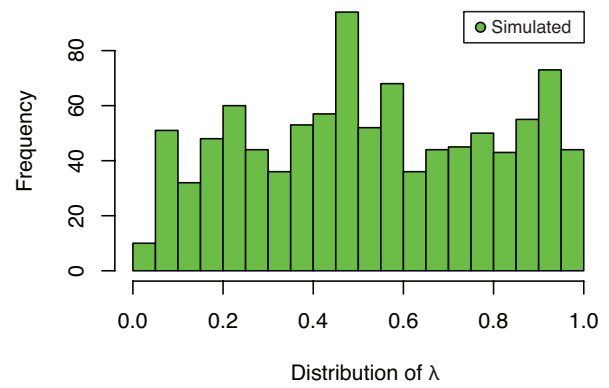

(A) Lower cluster mean vs. lower cluster standard deviation.  $N_{\text{real}} = 1105$ ,  $N_{\text{simulated}} = 1000$ . (B) Higher cluster mean vs. higher cluster standard deviation. (C) Distribution of the proportion of lower fitness cluster.



## Origin and sequence divergence of strains used in this study

| Strain    | Source                             | Location                              | Crossed with YJM326 | Estimated divergence to S288c (%) | References             |
|-----------|------------------------------------|---------------------------------------|---------------------|-----------------------------------|------------------------|
| BC187     | Barrel fermentation                | USA                                   |                     | 0.37                              | Liti et al. 2009       |
| YPS128    | Soil beneath <i>Quercus alba</i>   | Pennsylvania, USA                     |                     | 0.53                              | Liti et al. 2009       |
| DBVPG1106 | Grapes                             | Australia                             |                     | 0.35                              | Liti et al. 2009       |
| L-1374    | Wine                               | Chile                                 |                     | 0.36                              | Liti et al. 2009       |
| 378604X   | Clinical sputum                    | Newcastle, UK                         |                     | 0.41                              | Liti et al. 2009       |
| YJM975    | Clinical isolate (Vaginal)         | Bergamo, Italy                        |                     | 0.36                              | Liti et al. 2009       |
| DBVPG6044 | Bili wine                          | West Africa, Africa                   |                     | 0.60                              | Liti et al. 2009       |
| Y55       | Wine                               | France                                |                     | 0.54                              | Liti et al. 2009       |
| CLIB192   | Bakery                             | France                                |                     | 0.11                              | Schacherer et al. 2009 |
| CLIB272   | Beer                               | USA                                   | *                   | 0.23                              | Schacherer et al. 2009 |
| CLIB382   | Beer                               | Ireland                               |                     | 0.25                              | Schacherer et al. 2009 |
| YJM145    | AIDS patients                      | USA                                   |                     | 0.37                              | Schacherer et al. 2009 |
| YJM280    | Peritoneal fluid                   | USA                                   |                     | 0.35                              | Schacherer et al. 2009 |
| YJM320    | Blood                              | California, USA                       | *                   | 0.32                              | Schacherer et al. 2009 |
| YJM326    | Human, clinical                    | California, USA                       |                     | 0.32                              | Schacherer et al. 2009 |
| YJM421    | Ascites fluid                      | USA                                   | *                   | 0.35                              | Schacherer et al. 2009 |
| YJM434    | Human, clinical                    | Europe                                | *                   | 0.38                              | Schacherer et al. 2009 |
| YJM440    | Human, clinical                    | NA                                    | *                   |                                   | Schacherer et al. 2009 |
| YJM653    | Human, clinical                    | NA                                    | *                   |                                   | Schacherer et al. 2009 |
| YJM678    | Human, clinical                    | NA                                    | *                   |                                   | Schacherer et al. 2009 |
| CBS7960   | Ethanol factory (sugar cane syrup) | São Paulo, Brazil                     |                     | 0.39                              | Schacherer et al. 2009 |
| CECT10109 | Prickly pear                       | Spain                                 | *                   | 0.31                              | Schacherer et al. 2009 |
| DBVPG3591 | Cocoa beans                        | NA                                    | *                   | 0.23                              | Schacherer et al. 2009 |
| DBVPG6861 | Poluted stream water               | Tijuca forest, Rio de Janeiro, Brazil |                     |                                   | Schacherer et al. 2009 |
| EM93      | Rotting fig                        | California, USA                       | *                   | 0.14                              | Schacherer et al. 2009 |
| YPS1000   | Exudates <i>Quercus sp.</i>        | USA                                   |                     | 0.41                              | Schacherer et al. 2009 |
| YPS163    | Soil beneath <i>Quercus rubra</i>  | USA                                   |                     | 0.36                              | Schacherer et al. 2009 |
| CLIB294   | Distillery                         | France                                | *                   | 0.25                              | Schacherer et al. 2009 |
| CLIB413   | Fermenting rice                    | China                                 |                     | 0.33                              | Schacherer et al. 2009 |
| K12       | Sake                               | Japan                                 |                     | 0.25                              | Schacherer et al. 2009 |
| Y10       | Coconut                            | Philippines                           |                     | 0.49                              | Schacherer et al. 2009 |
| Y12       | Palm wine                          | Ivory Coast                           | *                   | 0.35                              | Schacherer et al. 2009 |
| Y3        | Palm wine                          | Africa                                | *                   | 0.38                              | Schacherer et al. 2009 |
| Y9        | Ragi fermentation                  | Indonesia                             | *                   | 0.34                              | Schacherer et al. 2009 |
| YJM269    | Red Blauer Portugieser grapes      | Austria                               | *                   | 0.38                              | Schacherer et al. 2009 |
| CLIB154   | Wine                               | Russia                                | *                   | 0.21                              | Schacherer et al. 2009 |
| I14       | Vineyard soil                      | Italy                                 | *                   | 0.25                              | Schacherer et al. 2009 |
| UC8       | Wine                               | South Africa, Africa                  | *                   | 0.28                              | Schacherer et al. 2009 |
| WE372     | Wine                               | South Africa, Africa                  |                     | 0.26                              | Schacherer et al. 2009 |
| NC02      | Exudates <i>Quercus sp.</i>        | North Carolina, USA                   |                     | 0.43                              | Schacherer et al. 2009 |
| T7        | Exudates <i>Quercus sp.</i>        | Babler State Park, MO, USA            | *                   | 0.49                              | Schacherer et al. 2009 |

## Media compositions for conditions tested in this study

| Condition                        | Composition                                              | Stress type              |
|----------------------------------|----------------------------------------------------------|--------------------------|
| <b>YPD</b>                       | 2% bactopectone; 1% yeast extract; 2% glucose; 2% agar   | Rich medium              |
| <b>YP acetate 2%</b>             | 2% bactopectone; 1% yeast extract; 2% acetate; 2% agar   | Carbon sources           |
| <b>YP EtOH 2%</b>                | 2% bactopectone; 1% yeast extract; 2% ethanol; 2% agar   | Carbon sources           |
| <b>YP glycerol 2%</b>            | 2% bactopectone; 1% yeast extract; 2% glycerol; 2% agar  | Carbon sources           |
| <b>YP sorbitol 2%</b>            | 2% bactopectone; 1% yeast extract; 2% sorbitol; 2% agar  | Carbon sources           |
| <b>YP galactose 2%</b>           | 2% bactopectone; 1% yeast extract; 2% galactose; 2% agar | Carbon sources           |
| <b>YP ribose 2%</b>              | 2% bactopectone; 1% yeast extract; 2% ribose; 2% agar    | Carbon sources           |
| <b>YP xylose 2%</b>              | 2% bactopectone; 1% yeast extract; 2% xylose; 2% agar    | Carbon sources           |
| <b>YPD formamide 4%</b>          | YPD; formamide 4%                                        | Protein stability        |
| <b>YPD formamide 5%</b>          | YPD; formamide 5%                                        | Protein stability        |
| <b>YPD EtOH 15%</b>              | YPD; ethanol 15%                                         | Protein stability        |
| <b>YPD benomyl 200µg/ml</b>      | YPD; benomyl 200µg/ml                                    | Subcellular organization |
| <b>YPD benomyl 500µg/ml</b>      | YPD; benomyl 500µg/ml                                    | Subcellular organization |
| <b>YPD SDS 0.2%</b>              | YPD; SDS 0.2%                                            | Membrane stability       |
| <b>YPD DMSO 6%</b>               | YPD; DMSO 6%                                             | Membrane stability       |
| <b>YPD KCl 2M</b>                | YPD; KCl 2M                                              | Osmotic stress           |
| <b>YPD NaCl 1M</b>               | YPD; NaCl 1M                                             | Osmotic stress           |
| <b>YPD NaCl 1.5M</b>             | YPD; NaCl 1.5M                                           | Osmotic stress           |
| <b>YPD CuSO<sub>4</sub> 10mM</b> | YPD; CuSO <sub>4</sub> 10mM                              | Osmotic stress           |
| <b>YPD CuSO<sub>4</sub> 15mM</b> | YPD; CuSO <sub>4</sub> 15mM                              | Osmotic stress           |
| <b>YPD LiCl 250mM</b>            | YPD; LiCl 250mM                                          | Osmotic stress           |
| <b>YPD CHX 0.5µg/ml</b>          | YPD; cycloheximide 0.5µg/ml                              | Translation              |
| <b>YPD CHX 1µg/ml</b>            | YPD; cycloheximide 1µg/ml                                | Translation              |
| <b>YPD anisomycin 10µg/ml</b>    | YPD; anisomycin 10µg/ml                                  | Translation              |
| <b>YPD anisomycin 20µg/ml</b>    | YPD; anisomycin 20µg/ml                                  | Translation              |
| <b>YPD anisomycin 50µg/ml</b>    | YPD; anisomycin 50µg/ml                                  | Translation              |
| <b>YPD caffeine 40mM</b>         | YPD; caffeine 40mM                                       | Signal transduction      |
| <b>YPD caffeine 50mM</b>         | YPD; caffeine 50mM                                       | Signal transduction      |
| <b>YPD 6AU 600µg/ml</b>          | YPD; 6-azauracile 600µg/ml                               | Transcription            |
| <b>YPD nystatin 10µg/ml</b>      | YPD; nystatin 10µg/ml                                    | Sterol biosynthesis      |
| <b>YPD Mv 20mM</b>               | YPD; methylviologen 20mM                                 | Oxydative stress         |
